# Supplementary material
Source: PubMed Central journal article supplement (PMC4562456)

## **Supplemental Methods: Bioinformatics and statistical analysis**

### *Data processing*

Metabolite data (raw counts from tandem mass spectrometry) was normalized by median centering. Missing values were imputed with the lower limit of detection for a given metabolite. Data normalization was used to reduce systematic bias in the data that may have arisen from instrumental or sampling problems, and to limit noise introduced by inter-subject heterogeneity.

### *Fold-change analysis*

For between-group comparisons by fold-change analysis, significantly altered metabolites were defined by a fold change (FC)  $>1.2$ , p-value  $<0.05$  and false discovery rate (FDR)  $\leq 0.1$ . Multiple hypothesis testing corrections were performed by calculating the local false discovery rates using `fdrtool` in R.

### *Classification analysis*

To identify metabolite clusters that distinguished between groups defined by HIV status or depression score cut-offs, classification analysis was performed by unsupervised hierarchical clustering in heatmaps, partial least squares discriminant analysis (PLS-DA), and Random Forest in the Metaboanalyst web portal (<http://www.metaboanalyst.ca>). Unsupervised and supervised classification analyses are methods used to reduce the complexity of high-dimensional datasets, assess differences between groups and/or phenotypes, and identify top-ranked features that best differentiate between groups. Unsupervised hierarchical clustering in heatmaps groups objects or subjects into “clusters” based on similarity, and begins with each sample as a separate cluster and then proceeds to combine all samples into one cluster. This process results in generation of a dendrogram and/or heatmap, which shows the hierarchy of the clusters. PLS-DA is a supervised method that uses multivariate regression techniques to perform classification and feature selection. The algorithm summarizes the original values into fewer variables using their weighted averages and uses cross-validation to select components for classification. Random Forest is a supervised learning algorithm that uses an ensemble of classification trees. Each tree is grown by random feature selection from a bootstrap sample of the dataset. Each branch is split using the best subset of predictors randomly chosen at that node. Classification is determined by the cumulative ensemble learning.

### *Correlation analysis*

Pearson and Spearman correlation analysis were performed on log-transformed data in R. Pearson correlations were used to evaluate relationships between metabolites ( $p < 0.05$ ,  $FDR \leq 0.1$ ). Spearman correlations were used to examine relationships between metabolites, depression scores, and K:T ratio. Correlation analyses were visualized using a correlation matrix constructed in R using the heatmap.2 function. Supervised hierarchical clustering was used to identify clusters of inter-related metabolites.

### *Pathway analysis*

Metabolic pathways were extracted from the Kyoto Encyclopedia of Genes and Genomes (KEGG), Small Molecule Pathways Database (SMPDB), and PubChem. Biofunctions were extracted from Human Metabolome Database (HMDB) ([www.hmdb.ca](http://www.hmdb.ca)). Visualization of pathway mapping using metabolite information extracted from these databases was performed in Cytoscape.

**Supplemental Table 1.** Alterations in the plasma metabolome of HIV-positive and r (current and nadir CD4 count). Subjects with and without depression in the HIV-nega metabolites were defined by a fold change (FC) >1.2 and p-value <0.01.

| BIOCHEMICAL                         | SUPER_PATHWAY |
|-------------------------------------|---------------|
| alanine                             | Amino acid    |
| beta-alanine                        | Amino acid    |
| N-acetylalanine                     | Amino acid    |
| 2-aminobutyrate                     | Amino acid    |
| creatine                            | Amino acid    |
| creatinine                          | Amino acid    |
| 2-hydroxybutyrate (AHB)             | Amino acid    |
| cysteine                            | Amino acid    |
| N-acetylmethionine                  | Amino acid    |
| glutamine                           | Amino acid    |
| pyroglutamine*                      | Amino acid    |
| 5-oxoproline                        | Amino acid    |
| beta-hydroxypyruvate                | Amino acid    |
| betaine                             | Amino acid    |
| dimethylglycine                     | Amino acid    |
| glycine                             | Amino acid    |
| N-acetylglycine                     | Amino acid    |
| N-acetyserine                       | Amino acid    |
| N-acetylthreonine                   | Amino acid    |
| serine                              | Amino acid    |
| threonine                           | Amino acid    |
| 4-acetamidobutanoate                | Amino acid    |
| 3-methylhistidine                   | Amino acid    |
| glutaryl carnitine (C5)             | Amino acid    |
| lysine                              | Amino acid    |
| pipecolate                          | Amino acid    |
| 3-(4-hydroxyphenyl)lactate          | Amino acid    |
| 3-methoxytyrosine                   | Amino acid    |
| 3-phenylpropionate (hydrocinnamate) | Amino acid    |
| 4-hydroxyphenylacetate              | Amino acid    |
| N-acetylphenylalanine               | Amino acid    |
| p-cresol sulfate                    | Amino acid    |
| phenol sulfate                      | Amino acid    |
| phenylacetate                       | Amino acid    |
| phenylacetylglutamine               | Amino acid    |
| phenylalanine                       | Amino acid    |
| phenyllactate (PLA)                 | Amino acid    |
| tyrosine                            | Amino acid    |
| 3-indoxyl sulfate                   | Amino acid    |
| C-glycosyltryptophan*               | Amino acid    |
| indoleacetate                       | Amino acid    |
| indolelactate                       | Amino acid    |
| indolepropionate                    | Amino acid    |
| kynurenate                          | Amino acid    |
| kynurenine                          | Amino acid    |

|                                |                        |
|--------------------------------|------------------------|
| serotonin (5HT)                | Amino acid             |
| tryptophan                     | Amino acid             |
| tryptophan betaine             | Amino acid             |
| arginine                       | Amino acid             |
| citrulline                     | Amino acid             |
| ornithine                      | Amino acid             |
| proline                        | Amino acid             |
| trans-4-hydroxyproline         | Amino acid             |
| urea                           | Amino acid             |
| 2-hydroxy-3-methylvalerate     | Amino acid             |
| 2-methylbutyrylcarnitine (C5)  | Amino acid             |
| 3-hydroxyisobutyrate           | Amino acid             |
| 3-methyl-2-oxobutyrate         | Amino acid             |
| 3-methyl-2-oxovalerate         | Amino acid             |
| 3-methylglutarylcarnitine (C6) | Amino acid             |
| 4-methyl-2-oxopentanoate       | Amino acid             |
| alpha-hydroxyisovalerate       | Amino acid             |
| beta-hydroxyisovalerate        | Amino acid             |
| isobutyrylcarnitine            | Amino acid             |
| isoleucine                     | Amino acid             |
| isovalerylcarnitine            | Amino acid             |
| leucine                        | Amino acid             |
| valine                         | Amino acid             |
| threonate                      | Cofactors and vitamins |
| bilirubin (E,E)*               | Cofactors and vitamins |
| bilirubin (Z,Z)                | Cofactors and vitamins |
| biliverdin                     | Cofactors and vitamins |
| heme                           | Cofactors and vitamins |
| urobilinogen                   | Cofactors and vitamins |
| nicotinamide                   | Cofactors and vitamins |
| pantothenate                   | Cofactors and vitamins |
| pyridoxate                     | Cofactors and vitamins |
| alpha-tocopherol               | Cofactors and vitamins |
| gamma-CEHC                     | Cofactors and vitamins |
| gamma-tocopherol               | Cofactors and vitamins |
| alpha-ketoglutarate            | Energy                 |
| citrate                        | Energy                 |
| fumarate                       | Energy                 |
| malate                         | Energy                 |
| succinate                      | Energy                 |
| phosphate                      | Energy                 |
| cholate                        | Lipid                  |
| deoxycholate                   | Lipid                  |
| glycochenodeoxycholate         | Lipid                  |
| glycocholate                   | Lipid                  |
| glycocholenate sulfate*        | Lipid                  |
| glycodeoxycholate              | Lipid                  |
| glycolithocholate sulfate*     | Lipid                  |
| taurocholate                   | Lipid                  |
| taurocholenate sulfate*        | Lipid                  |
| taurodeoxycholate              | Lipid                  |
| 3-dehydrocarnitine*            | Lipid                  |

|                                                      |       |
|------------------------------------------------------|-------|
| acetylcarnitine                                      | Lipid |
| carnitine                                            | Lipid |
| cis-4-decenoyl carnitine                             | Lipid |
| decanoylcarnitine                                    | Lipid |
| deoxycarnitine                                       | Lipid |
| hexanoylcarnitine                                    | Lipid |
| laurylcarnitine                                      | Lipid |
| octanoylcarnitine                                    | Lipid |
| oleoylcarnitine                                      | Lipid |
| stearoylcarnitine                                    | Lipid |
| docosahexaenoate (DHA; 22:6n3)                       | Lipid |
| docosapentaenoate (n3 DPA; 22:5n3)                   | Lipid |
| docosapentaenoate (n6 DPA; 22:5n6)                   | Lipid |
| eicosapentaenoate (EPA; 20:5n3)                      | Lipid |
| linoleate (18:2n6)                                   | Lipid |
| linolenate [alpha or gamma; (18:3n3 or 6)]           | Lipid |
| isovalerate                                          | Lipid |
| butyrylcarnitine                                     | Lipid |
| propionylcarnitine                                   | Lipid |
| stearamide                                           | Lipid |
| 1,11-undecanedicarboxylate                           | Lipid |
| 3-carboxy-4-methyl-5-propyl-2-furanpropanoate (CMPF) | Lipid |
| hexadecanedioate                                     | Lipid |
| octadecanedioate                                     | Lipid |
| sebacate (decanedioate)                              | Lipid |
| tetradecanedioate                                    | Lipid |
| 2-hydroxyoctanoate                                   | Lipid |
| 2-hydroxypalmitate                                   | Lipid |
| 2-hydroxystearate                                    | Lipid |
| choline                                              | Lipid |
| glycerol 3-phosphate (G3P)                           | Lipid |
| chiro-inositol                                       | Lipid |
| 3-hydroxybutyrate (BHBA)                             | Lipid |
| 10-heptadecenoate (17:1n7)                           | Lipid |
| 10-nonadecenoate (19:1n9)                            | Lipid |
| adrenate (22:4n6)                                    | Lipid |
| arachidonate (20:4n6)                                | Lipid |
| cis-vaccenate (18:1n7)                               | Lipid |
| dihomo-linoleate (20:2n6)                            | Lipid |
| docosadienoate (22:2n6)                              | Lipid |
| eicosenoate (20:1n9 or 11)                           | Lipid |
| margarate (17:0)                                     | Lipid |
| myristate (14:0)                                     | Lipid |
| myristoleate (14:1n5)                                | Lipid |
| nonadecanoate (19:0)                                 | Lipid |
| oleate (18:1n9)                                      | Lipid |
| palmitate (16:0)                                     | Lipid |
| palmitoleate (16:1n7)                                | Lipid |
| pentadecanoate (15:0)                                | Lipid |
| stearate (18:0)                                      | Lipid |
| stearidonate (18:4n3)                                | Lipid |
| 1-arachidonoylglycerophosphocholine*                 | Lipid |

|                                                |       |
|------------------------------------------------|-------|
| 1-arachidonoylglycerophosphoethanolamine*      | Lipid |
| 1-arachidonoylglycerophosphoinositol*          | Lipid |
| 1-docosahexaenoylglycerophosphocholine*        | Lipid |
| 1-docosapentaenoylglycerophosphocholine*       | Lipid |
| 1-eicosadienoylglycerophosphocholine*          | Lipid |
| 1-eicosatrienoylglycerophosphocholine*         | Lipid |
| 1-linoleoylglycerophosphocholine               | Lipid |
| 1-linoleoylglycerophosphoethanolamine*         | Lipid |
| 1-myristoylglycerophosphocholine               | Lipid |
| 1-oleoylglycerophosphocholine                  | Lipid |
| 1-oleoylglycerophosphoethanolamine             | Lipid |
| 1-palmitoleoylglycerophosphocholine*           | Lipid |
| 1-palmitoylglycerophosphocholine               | Lipid |
| 1-palmitoylglycerophosphoethanolamine          | Lipid |
| 1-palmitoylplasmylethanolamine*                | Lipid |
| 1-pentadecanoylglycerophosphocholine*          | Lipid |
| 1-stearoylglycerophosphocholine                | Lipid |
| 1-stearoylglycerophosphoethanolamine           | Lipid |
| 2-arachidonoylglycerophosphocholine*           | Lipid |
| 2-arachidonoylglycerophosphoethanolamine*      | Lipid |
| 2-linoleoylglycerophosphocholine*              | Lipid |
| 2-linoleoylglycerophosphoethanolamine*         | Lipid |
| 2-myristoylglycerophosphocholine*              | Lipid |
| 2-oleoylglycerophosphocholine*                 | Lipid |
| 2-oleoylglycerophosphoethanolamine*            | Lipid |
| 2-palmitoylglycerophosphocholine*              | Lipid |
| 2-palmitoylglycerophosphoethanolamine*         | Lipid |
| 10-undecenoate (11:1n1)                        | Lipid |
| caprate (10:0)                                 | Lipid |
| caproate (6:0)                                 | Lipid |
| caprylate (8:0)                                | Lipid |
| heptanoate (7:0)                               | Lipid |
| laurate (12:0)                                 | Lipid |
| pelargonate (9:0)                              | Lipid |
| undecanoate (11:0)                             | Lipid |
| palmitoyl sphingomyelin                        | Lipid |
| sphinganine                                    | Lipid |
| sphingosine                                    | Lipid |
| stearoyl sphingomyelin                         | Lipid |
| 21-hydroxypregnenolone disulfate               | Lipid |
| 4-androsten-3beta,17beta-diol disulfate 1*     | Lipid |
| 4-androsten-3beta,17beta-diol disulfate 2*     | Lipid |
| 5alpha-androstan-3alpha,17beta-diol disulfate  | Lipid |
| 5alpha-androstan-3beta,17beta-diol disulfate   | Lipid |
| 5alpha-pregnan-3beta,20alpha-diol disulfate    | Lipid |
| 7-alpha-hydroxy-3-oxo-4-cholestenoate (7-Hoca) | Lipid |
| andro steroid monosulfate 2*                   | Lipid |
| androsterone sulfate                           | Lipid |
| campesterol                                    | Lipid |
| cholesterol                                    | Lipid |
| cortisol                                       | Lipid |
| cortisone                                      | Lipid |

|                                         |            |
|-----------------------------------------|------------|
| dehydroisoandrosterone sulfate (DHEA-S) | Lipid      |
| epiandrosterone sulfate                 | Lipid      |
| lathosterol                             | Lipid      |
| pregn steroid monosulfate*              | Lipid      |
| pregnen-diol disulfate*                 | Lipid      |
| pregnenolone sulfate                    | Lipid      |
| hypoxanthine                            | Nucleotide |
| adenosine 5'-monophosphate (AMP)        | Nucleotide |
| N1-methyladenosine                      | Nucleotide |
| N6-carbamoylthreonyladenosine           | Nucleotide |
| allantoin                               | Nucleotide |
| urate                                   | Nucleotide |
| 5-methyluridine (ribothymidine)         | Nucleotide |
| pseudouridine                           | Nucleotide |
| uridine                                 | Nucleotide |
| cyclo(leu-pro)                          | Peptide    |
| tryptophylglutamate                     | Peptide    |
| ADSGEGDFXAEGGGVR*                       | Peptide    |
| DSGEGDFXAEGGGVR*                        | Peptide    |
| gamma-glutamylisoleucine*               | Peptide    |
| gamma-glutamylleucine                   | Peptide    |
| gamma-glutamylphenylalanine             | Peptide    |
| gamma-glutamyltyrosine                  | Peptide    |
| bradykinin                              | Peptide    |
| bradykinin, hydroxy-pro(3)              | Peptide    |
| HWESASLLR                               | Peptide    |
| HWESASXX*                               | Peptide    |
| XHWESASXXR*                             | Peptide    |

negative subjects with and without depression. Subjects with and without depression in the HIV-positive and HIV-negative cohort were matched by age, gender, race, HCV status, smoking, drug use. Shown are metabolites

| SUB_PATHWAY                                   | HIV-positive test cohort |         |         |
|-----------------------------------------------|--------------------------|---------|---------|
|                                               | Fold change              | p-value | q-value |
| Alanine and aspartate metabolism              | -1.24                    | 0.2183  | 0.4046  |
| Alanine and aspartate metabolism              | 1.02                     | 0.9414  | 0.7356  |
| Alanine and aspartate metabolism              | -1.09                    | 0.3328  | 0.4959  |
| Butanoate metabolism                          | -1.07                    | 0.4690  | 0.5809  |
| Creatine metabolism                           | -1.13                    | 0.5176  | 0.6047  |
| Creatine metabolism                           | -1.07                    | 0.4734  | 0.5832  |
| Cysteine, methionine, SAM, taurine metabolism | 1.02                     | 0.8949  | 0.7256  |
| Cysteine, methionine, SAM, taurine metabolism | 1.21                     | 0.3314  | 0.4948  |
| Cysteine, methionine, SAM, taurine metabolism | -1.35                    | 0.1167  | 0.3378  |
| Glutamate metabolism                          | -1.27                    | 0.5766  | 0.6302  |
| Glutamate metabolism                          | -1.07                    | 0.7377  | 0.6856  |
| Glutathione metabolism                        | -1.42                    | 0.0544  | 0.2664  |
| Glycine, serine and threonine metabolism      | 1.04                     | 0.8683  | 0.7196  |
| Glycine, serine and threonine metabolism      | 1.02                     | 0.7951  | 0.7015  |
| Glycine, serine and threonine metabolism      | -1.28                    | 0.1633  | 0.3705  |
| Glycine, serine and threonine metabolism      | -1.42                    | 0.0077  | 0.1735  |
| Glycine, serine and threonine metabolism      | -1.02                    | 0.9161  | 0.7303  |
| Glycine, serine and threonine metabolism      | -1.01                    | 0.9725  | 0.7419  |
| Glycine, serine and threonine metabolism      | -1.22                    | 0.2004  | 0.3908  |
| Glycine, serine and threonine metabolism      | -1.19                    | 0.1753  | 0.3768  |
| Glycine, serine and threonine metabolism      | 1.04                     | 0.7217  | 0.6808  |
| Guanidino and acetamido metabolism            | 1.47                     | 0.0294  | 0.2444  |
| Histidine metabolism                          | -1.61                    | 0.1521  | 0.3640  |
| Lysine metabolism                             | -1.18                    | 0.2746  | 0.4480  |
| Lysine metabolism                             | 1.04                     | 0.6893  | 0.6707  |
| Lysine metabolism                             | 1.04                     | 0.8343  | 0.7115  |
| Phenylalanine & tyrosine metabolism           | -1.40                    | 0.0834  | 0.3006  |
| Phenylalanine & tyrosine metabolism           | -1.13                    | 0.2848  | 0.4570  |
| Phenylalanine & tyrosine metabolism           | -1.65                    | 0.0650  | 0.2765  |
| Phenylalanine & tyrosine metabolism           | -2.68                    | 0.0003  | 0.0257  |
| Phenylalanine & tyrosine metabolism           | -1.26                    | 0.0397  | 0.2563  |
| Phenylalanine & tyrosine metabolism           | -1.95                    | 0.0231  | 0.2351  |
| Phenylalanine & tyrosine metabolism           | 1.18                     | 0.4978  | 0.5953  |
| Phenylalanine & tyrosine metabolism           | -2.58                    | 0.0002  | 0.0257  |
| Phenylalanine & tyrosine metabolism           | -1.85                    | 0.0283  | 0.2431  |
| Phenylalanine & tyrosine metabolism           | -1.18                    | 0.1197  | 0.3404  |
| Phenylalanine & tyrosine metabolism           | -1.31                    | 0.1583  | 0.3677  |
| Phenylalanine & tyrosine metabolism           | -1.13                    | 0.3197  | 0.4858  |
| Tryptophan metabolism                         | -1.54                    | 0.0745  | 0.2873  |
| Tryptophan metabolism                         | -1.11                    | 0.5106  | 0.6014  |
| Tryptophan metabolism                         | -1.23                    | 0.4601  | 0.5762  |
| Tryptophan metabolism                         | -1.33                    | 0.0258  | 0.2396  |
| Tryptophan metabolism                         | 1.15                     | 0.6082  | 0.6425  |
| Tryptophan metabolism                         | -1.07                    | 0.7624  | 0.6926  |
| Tryptophan metabolism                         | -1.12                    | 0.3859  | 0.5328  |



|                                             |       |        |        |
|---------------------------------------------|-------|--------|--------|
| Tryptophan metabolism                       | 1.48  | 0.3359 | 0.4982 |
| Tryptophan metabolism                       | -1.11 | 0.3646 | 0.5187 |
| Tryptophan metabolism                       | -1.41 | 0.4690 | 0.5809 |
| Urea cycle; arginine-, proline-, metabolism | -1.02 | 0.9409 | 0.7355 |
| Urea cycle; arginine-, proline-, metabolism | -1.37 | 0.1068 | 0.3283 |
| Urea cycle; arginine-, proline-, metabolism | -1.17 | 0.3592 | 0.5149 |
| Urea cycle; arginine-, proline-, metabolism | -1.09 | 0.4049 | 0.5448 |
| Urea cycle; arginine-, proline-, metabolism | -1.11 | 0.4121 | 0.5491 |
| Urea cycle; arginine-, proline-, metabolism | -1.18 | 0.2387 | 0.4192 |
| Valine, leucine and isoleucine metabolism   | 1.25  | 0.3722 | 0.5238 |
| Valine, leucine and isoleucine metabolism   | -1.27 | 0.0842 | 0.3520 |
| Valine, leucine and isoleucine metabolism   | 1.00  | 0.9845 | 0.7442 |
| Valine, leucine and isoleucine metabolism   | -1.09 | 0.5164 | 0.6041 |
| Valine, leucine and isoleucine metabolism   | -1.15 | 0.2651 | 0.4397 |
| Valine, leucine and isoleucine metabolism   | -1.09 | 0.7797 | 0.6974 |
| Valine, leucine and isoleucine metabolism   | -1.12 | 0.4566 | 0.5744 |
| Valine, leucine and isoleucine metabolism   | 1.14  | 0.5440 | 0.6165 |
| Valine, leucine and isoleucine metabolism   | -1.27 | 0.2210 | 0.4066 |
| Valine, leucine and isoleucine metabolism   | -1.77 | 0.0088 | 0.1825 |
| Valine, leucine and isoleucine metabolism   | -1.14 | 0.1632 | 0.3705 |
| Valine, leucine and isoleucine metabolism   | -1.84 | 0.0008 | 0.0456 |
| Valine, leucine and isoleucine metabolism   | -1.15 | 0.1934 | 0.3851 |
| Valine, leucine and isoleucine metabolism   | -1.03 | 0.6751 | 0.6661 |
| Ascorbate and aldarate metabolism           | 1.30  | 0.1821 | 0.3801 |
| Hemoglobin and porphyrin metabolism         | 1.09  | 0.8608 | 0.7178 |
| Hemoglobin and porphyrin metabolism         | 1.17  | 0.7752 | 0.6961 |
| Hemoglobin and porphyrin metabolism         | -1.18 | 0.5934 | 0.6369 |
| Hemoglobin and porphyrin metabolism         | 1.20  | 0.6712 | 0.6648 |
| Hemoglobin and porphyrin metabolism         | -1.67 | 0.1719 | 0.3751 |
| Nicotinate and nicotinamide metabolism      | -1.15 | 0.4478 | 0.5696 |
| Pantothenate and CoA metabolism             | 1.40  | 0.0175 | 0.2225 |
| Pyridoxal metabolism                        | 1.33  | 0.2689 | 0.4428 |
| Tocopherol metabolism                       | -1.22 | 0.3919 | 0.5367 |
| Tocopherol metabolism                       | -1.16 | 0.4454 | 0.5683 |
| Tocopherol metabolism                       | -1.48 | 0.1256 | 0.3454 |
| Krebs cycle                                 | 1.64  | 0.0641 | 0.2758 |
| Krebs cycle                                 | 2.30  | 0.1272 | 0.3466 |
| Krebs cycle                                 | 1.15  | 0.2383 | 0.4189 |
| Krebs cycle                                 | 1.13  | 0.5346 | 0.6124 |
| Krebs cycle                                 | 1.24  | 0.2018 | 0.3920 |
| Oxidative phosphorylation                   | -1.11 | 0.0334 | 0.2496 |
| Bile acid metabolism                        | -1.18 | 0.5087 | 0.6005 |
| Bile acid metabolism                        | -1.66 | 0.1182 | 0.3391 |
| Bile acid metabolism                        | -1.34 | 0.2786 | 0.4516 |
| Bile acid metabolism                        | -1.38 | 0.1636 | 0.3707 |
| Bile acid metabolism                        | 1.25  | 0.4290 | 0.5591 |
| Bile acid metabolism                        | -1.97 | 0.0261 | 0.2400 |
| Bile acid metabolism                        | 1.07  | 0.8235 | 0.7088 |
| Bile acid metabolism                        | 1.60  | 0.1428 | 0.3581 |
| Bile acid metabolism                        | 2.09  | 0.0217 | 0.2325 |
| Bile acid metabolism                        | 1.31  | 0.5693 | 0.6272 |
| Carnitine metabolism                        | -1.39 | 0.0465 | 0.2616 |

|                                              |       |        |        |
|----------------------------------------------|-------|--------|--------|
| Carnitine metabolism                         | -1.09 | 0.5734 | 0.6289 |
| Carnitine metabolism                         | -1.07 | 0.3823 | 0.5305 |
| Carnitine metabolism                         | -1.50 | 0.1332 | 0.3513 |
| Carnitine metabolism                         | -1.39 | 0.2381 | 0.4187 |
| Carnitine metabolism                         | -1.26 | 0.0250 | 0.2383 |
| Carnitine metabolism                         | -1.44 | 0.1598 | 0.3686 |
| Carnitine metabolism                         | -1.63 | 0.0501 | 0.2640 |
| Carnitine metabolism                         | -1.34 | 0.3273 | 0.4917 |
| Carnitine metabolism                         | -1.31 | 0.1287 | 0.3478 |
| Carnitine metabolism                         | -1.50 | 0.0529 | 0.2656 |
| Essential fatty acid                         | 1.27  | 0.3198 | 0.4859 |
| Essential fatty acid                         | -1.04 | 0.8774 | 0.7217 |
| Essential fatty acid                         | 1.48  | 0.1856 | 0.3817 |
| Essential fatty acid                         | 1.02  | 0.9210 | 0.7313 |
| Essential fatty acid                         | -1.06 | 0.7066 | 0.6762 |
| Essential fatty acid                         | -1.05 | 0.8166 | 0.7070 |
| Fatty acid metabolism                        | -1.71 | 0.0705 | 0.2809 |
| Fatty acid metabolism (also BCAA metabolism) | -1.24 | 0.1935 | 0.3851 |
| Fatty acid metabolism (also BCAA metabolism) | -1.40 | 0.0545 | 0.2664 |
| Fatty acid, amide                            | 1.01  | 0.9632 | 0.7400 |
| Fatty acid, dicarboxylate                    | -1.06 | 0.7207 | 0.6805 |
| Fatty acid, dicarboxylate                    | -1.45 | 0.2489 | 0.4259 |
| Fatty acid, dicarboxylate                    | -1.13 | 0.5608 | 0.6237 |
| Fatty acid, dicarboxylate                    | -1.39 | 0.1238 | 0.3439 |
| Fatty acid, dicarboxylate                    | -1.52 | 0.0938 | 0.3140 |
| Fatty acid, dicarboxylate                    | -1.36 | 0.0955 | 0.3160 |
| Fatty acid, monohydroxy                      | -1.42 | 0.0301 | 0.2452 |
| Fatty acid, monohydroxy                      | -1.16 | 0.4797 | 0.5864 |
| Fatty acid, monohydroxy                      | -1.11 | 0.6261 | 0.6492 |
| Glycerolipid metabolism                      | 1.10  | 0.0606 | 0.2726 |
| Glycerolipid metabolism                      | 1.12  | 0.7294 | 0.6831 |
| Inositol metabolism                          | -1.79 | 0.1679 | 0.3730 |
| Ketone bodies                                | -1.29 | 0.2842 | 0.4565 |
| Long chain fatty acid                        | 1.14  | 0.4412 | 0.5660 |
| Long chain fatty acid                        | 1.08  | 0.6514 | 0.6581 |
| Long chain fatty acid                        | 1.03  | 0.8792 | 0.7221 |
| Long chain fatty acid                        | 1.20  | 0.4796 | 0.5863 |
| Long chain fatty acid                        | -1.22 | 0.3664 | 0.5199 |
| Long chain fatty acid                        | 1.26  | 0.2459 | 0.4239 |
| Long chain fatty acid                        | 1.32  | 0.2101 | 0.3985 |
| Long chain fatty acid                        | -1.03 | 0.8805 | 0.7224 |
| Long chain fatty acid                        | -1.03 | 0.7969 | 0.7020 |
| Long chain fatty acid                        | 1.04  | 0.7442 | 0.6874 |
| Long chain fatty acid                        | 1.14  | 0.5452 | 0.6170 |
| Long chain fatty acid                        | -1.02 | 0.8394 | 0.7127 |
| Long chain fatty acid                        | 1.17  | 0.4027 | 0.5434 |
| Long chain fatty acid                        | -1.01 | 0.9606 | 0.7395 |
| Long chain fatty acid                        | 1.16  | 0.4315 | 0.5605 |
| Long chain fatty acid                        | 1.10  | 0.4238 | 0.5560 |
| Long chain fatty acid                        | -1.03 | 0.7895 | 0.7000 |
| Long chain fatty acid                        | 1.13  | 0.6293 | 0.6503 |
| Lysolipid                                    | 1.09  | 0.5963 | 0.6380 |

|                         |       |        |        |
|-------------------------|-------|--------|--------|
| Lysolipid               | -1.26 | 0.1028 | 0.3242 |
| Lysolipid               | -1.74 | 0.0017 | 0.0727 |
| Lysolipid               | -1.08 | 0.6758 | 0.6664 |
| Lysolipid               | 1.02  | 0.9144 | 0.7299 |
| Lysolipid               | -1.22 | 0.3267 | 0.4912 |
| Lysolipid               | -1.10 | 0.5814 | 0.6321 |
| Lysolipid               | -1.39 | 0.0522 | 0.2652 |
| Lysolipid               | -1.72 | 0.0038 | 0.1237 |
| Lysolipid               | -1.21 | 0.4015 | 0.5427 |
| Lysolipid               | -1.27 | 0.1936 | 0.3852 |
| Lysolipid               | -1.12 | 0.3779 | 0.5276 |
| Lysolipid               | -1.22 | 0.2914 | 0.4627 |
| Lysolipid               | -1.06 | 0.7222 | 0.6810 |
| Lysolipid               | 1.07  | 0.6069 | 0.6420 |
| Lysolipid               | 1.20  | 0.5450 | 0.6170 |
| Lysolipid               | -1.06 | 0.6926 | 0.6718 |
| Lysolipid               | -1.49 | 0.1118 | 0.3332 |
| Lysolipid               | 1.13  | 0.2627 | 0.4377 |
| Lysolipid               | -1.21 | 0.2090 | 0.3976 |
| Lysolipid               | -1.10 | 0.5705 | 0.6277 |
| Lysolipid               | -1.61 | 0.0173 | 0.2219 |
| Lysolipid               | -1.36 | 0.1720 | 0.3751 |
| Lysolipid               | -1.03 | 0.9138 | 0.7298 |
| Lysolipid               | -1.38 | 0.0834 | 0.3006 |
| Lysolipid               | -1.37 | 0.1026 | 0.3240 |
| Lysolipid               | -1.07 | 0.7575 | 0.6912 |
| Lysolipid               | 1.36  | 0.1875 | 0.3825 |
| Medium chain fatty acid | -1.01 | 0.9797 | 0.7433 |
| Medium chain fatty acid | -1.11 | 0.3593 | 0.5150 |
| Medium chain fatty acid | -1.75 | 0.0163 | 0.2189 |
| Medium chain fatty acid | -1.33 | 0.1533 | 0.3648 |
| Medium chain fatty acid | -1.65 | 0.0202 | 0.2293 |
| Medium chain fatty acid | -1.07 | 0.4506 | 0.5711 |
| Medium chain fatty acid | -1.16 | 0.4081 | 0.5467 |
| Medium chain fatty acid | 1.06  | 0.5438 | 0.6164 |
| Sphingolipid            | -1.21 | 0.0358 | 0.2524 |
| Sphingolipid            | 1.87  | 0.0444 | 0.2601 |
| Sphingolipid            | 1.91  | 0.0705 | 0.2809 |
| Sphingolipid            | -1.29 | 0.1003 | 0.3215 |
| Sterol/Steroid          | -1.31 | 0.0706 | 0.2809 |
| Sterol/Steroid          | -1.52 | 0.2164 | 0.4032 |
| Sterol/Steroid          | 1.12  | 0.5582 | 0.6226 |
| Sterol/Steroid          | -1.04 | 0.8835 | 0.7231 |
| Sterol/Steroid          | -1.98 | 0.1132 | 0.3346 |
| Sterol/Steroid          | 1.36  | 0.2568 | 0.4327 |
| Sterol/Steroid          | 1.23  | 0.2367 | 0.4178 |
| Sterol/Steroid          | 1.57  | 0.0658 | 0.2772 |
| Sterol/Steroid          | -1.75 | 0.1859 | 0.3818 |
| Sterol/Steroid          | -1.34 | 0.4067 | 0.5459 |
| Sterol/Steroid          | -1.09 | 0.1740 | 0.3762 |
| Sterol/Steroid          | -1.39 | 0.0427 | 0.2588 |
| Sterol/Steroid          | -1.21 | 0.1568 | 0.3668 |

|                                                      |       |        |        |
|------------------------------------------------------|-------|--------|--------|
| Sterol/Steroid                                       | -1.04 | 0.8750 | 0.7211 |
| Sterol/Steroid                                       | -1.58 | 0.3144 | 0.4816 |
| Sterol/Steroid                                       | 1.08  | 0.7184 | 0.6798 |
| Sterol/Steroid                                       | 1.01  | 0.9526 | 0.7379 |
| Sterol/Steroid                                       | -1.25 | 0.3943 | 0.5382 |
| Sterol/Steroid                                       | -1.19 | 0.3559 | 0.5126 |
| Purine metabolism, (hypo)xanthine/inosine containing | 1.87  | 0.0637 | 0.2754 |
| Purine metabolism, adenine containing                | -1.55 | 0.2460 | 0.4240 |
| Purine metabolism, adenine containing                | -1.06 | 0.7890 | 0.6999 |
| Purine metabolism, guanine containing                | -1.05 | 0.7935 | 0.7011 |
| Purine metabolism, urate metabolism                  | -1.23 | 0.4387 | 0.5646 |
| Purine metabolism, urate metabolism                  | -1.24 | 0.0186 | 0.2255 |
| Pyrimidine metabolism, uracil containing             | -1.11 | 0.4056 | 0.5452 |
| Pyrimidine metabolism, uracil containing             | 1.09  | 0.4464 | 0.5688 |
| Pyrimidine metabolism, uracil containing             | 1.23  | 0.0430 | 0.2591 |
| Dipeptide                                            | 1.01  | 0.9882 | 0.7449 |
| Dipeptide                                            | 1.10  | 0.7601 | 0.6920 |
| Fibrinogen cleavage peptide                          | -1.29 | 0.6949 | 0.6725 |
| Fibrinogen cleavage peptide                          | -1.24 | 0.6278 | 0.6498 |
| gamma-glutamyl                                       | -1.89 | 0.0062 | 0.1585 |
| gamma-glutamyl                                       | -1.63 | 0.0444 | 0.2601 |
| gamma-glutamyl                                       | -1.38 | 0.1454 | 0.3598 |
| gamma-glutamyl                                       | -1.49 | 0.0513 | 0.2647 |
| Polypeptide                                          | -1.45 | 0.5719 | 0.6283 |
| Polypeptide                                          | -1.16 | 0.7683 | 0.6942 |
| Polypeptide                                          | -1.80 | 0.3008 | 0.4706 |
| Polypeptide                                          | -2.03 | 0.1670 | 0.3725 |
| Polypeptide                                          | -1.06 | 0.9295 | 0.7331 |

nd test cohorts were matched by age, gender, HCV status, drug use, and stage of disease detected across all three cohorts following data pre-processing. Significantly altered

| HIV-positive validation cohort |         |         | HIV-negative cohort |         |         |
|--------------------------------|---------|---------|---------------------|---------|---------|
| Fold change                    | p-value | q-value | Fold change         | p-value | q-value |
| 1.11                           | 0.4093  | 0.7925  | -1.01               | 0.8777  | 0.8198  |
| -1.59                          | 0.0256  | 0.4814  | -1.73               | 0.1185  | 0.5934  |
| -1.09                          | 0.2232  | 0.6757  | 1.03                | 0.6371  | 0.7676  |
| -1.21                          | 0.2510  | 0.7008  | -1.01               | 0.9836  | 0.8361  |
| -1.23                          | 0.2997  | 0.7367  | -1.31               | 0.2172  | 0.6111  |
| -1.03                          | 0.7362  | 0.8730  | -1.13               | 0.1349  | 0.5967  |
| -1.11                          | 0.5527  | 0.8376  | -1.03               | 0.9134  | 0.8257  |
| 1.01                           | 0.9141  | 0.8951  | -1.13               | 0.3429  | 0.6564  |
| -1.05                          | 0.8522  | 0.8883  | -1.15               | 0.3850  | 0.6663  |
| 1.01                           | 0.9410  | 0.8978  | -1.05               | 0.6337  | 0.7667  |
| -1.30                          | 0.3786  | 0.7794  | 1.31                | 0.3618  | 0.6611  |
| -1.17                          | 0.2250  | 0.6774  | 1.03                | 0.7798  | 0.8017  |
| -1.13                          | 0.4523  | 0.8085  | -1.11               | 0.5949  | 0.7552  |
| -1.04                          | 0.5765  | 0.8433  | 1.18                | 0.1418  | 0.5979  |
| -1.38                          | 0.1906  | 0.6465  | -1.07               | 0.6750  | 0.7778  |
| 1.01                           | 0.9704  | 0.9006  | 1.03                | 0.8651  | 0.8177  |
| 1.16                           | 0.6369  | 0.8560  | 1.21                | 0.4776  | 0.7123  |
| 1.03                           | 0.7199  | 0.8705  | -1.12               | 0.3526  | 0.6589  |
| -1.26                          | 0.2029  | 0.6544  | -1.34               | 0.1422  | 0.5980  |
| -1.01                          | 0.9078  | 0.8944  | -1.13               | 0.2694  | 0.6329  |
| -1.06                          | 0.5991  | 0.8483  | -1.13               | 0.3253  | 0.6516  |
| 1.03                           | 0.7197  | 0.8704  | -1.15               | 0.1447  | 0.5984  |
| -1.57                          | 0.2682  | 0.7145  | -1.50               | 0.3582  | 0.6602  |
| -1.06                          | 0.5950  | 0.8474  | 1.08                | 0.5111  | 0.7260  |
| -1.02                          | 0.8074  | 0.8828  | -1.13               | 0.1907  | 0.6040  |
| 1.13                           | 0.6199  | 0.8526  | -1.17               | 0.5090  | 0.7252  |
| 1.13                           | 0.2866  | 0.7279  | 1.10                | 0.4321  | 0.6914  |
| 1.22                           | 0.1589  | 0.6397  | 1.16                | 0.1952  | 0.6044  |
| -1.20                          | 0.3507  | 0.7660  | -1.39               | 0.1590  | 0.6005  |
| -1.53                          | 0.0863  | 0.6074  | 1.13                | 0.7228  | 0.7894  |
| -1.39                          | 0.1219  | 0.6277  | -1.20               | 0.3903  | 0.6693  |
| 1.22                           | 0.6239  | 0.8534  | 1.00                | 0.9899  | 0.8369  |
| 1.16                           | 0.5443  | 0.8355  | -1.10               | 0.7010  | 0.7842  |
| -1.04                          | 0.8539  | 0.8885  | -2.17               | 0.0007  | 0.0672  |
| -1.28                          | 0.3184  | 0.7482  | 1.07                | 0.7497  | 0.7954  |
| -1.08                          | 0.2631  | 0.7106  | -1.16               | 0.1144  | 0.5924  |
| 1.16                           | 0.4016  | 0.7894  | 1.40                | 0.0623  | 0.5695  |
| -1.05                          | 0.5885  | 0.8460  | -1.18               | 0.0982  | 0.5877  |
| -1.19                          | 0.4071  | 0.7917  | -1.13               | 0.5437  | 0.7382  |
| 1.04                           | 0.5828  | 0.8447  | 1.09                | 0.3932  | 0.6709  |
| -1.45                          | 0.2572  | 0.7059  | -1.21               | 0.5326  | 0.7341  |
| 1.02                           | 0.8950  | 0.8931  | 1.03                | 0.8734  | 0.8191  |
| -1.12                          | 0.6610  | 0.8605  | -1.19               | 0.4554  | 0.7025  |
| 1.09                           | 0.5306  | 0.8320  | -1.07               | 0.6541  | 0.7723  |
| 1.05                           | 0.6224  | 0.8531  | 1.05                | 0.7927  | 0.8043  |

|       |        |        |       |        |        |
|-------|--------|--------|-------|--------|--------|
| -1.49 | 0.2258 | 0.6782 | -1.34 | 0.1907 | 0.6040 |
| -1.16 | 0.0861 | 0.6073 | -1.05 | 0.6304 | 0.7657 |
| -1.76 | 0.1761 | 0.6437 | -1.61 | 0.2475 | 0.6237 |
| -1.09 | 0.7114 | 0.8691 | -1.75 | 0.0942 | 0.5863 |
| -1.16 | 0.3327 | 0.7564 | -1.35 | 0.0175 | 0.4677 |
| -1.46 | 0.0226 | 0.4723 | -1.35 | 0.0523 | 0.5604 |
| -1.07 | 0.5899 | 0.8463 | -1.10 | 0.4098 | 0.6800 |
| -1.29 | 0.0717 | 0.5941 | -1.46 | 0.0721 | 0.5761 |
| -1.17 | 0.1546 | 0.6386 | -1.11 | 0.3168 | 0.6491 |
| 1.04  | 0.8066 | 0.8827 | 1.43  | 0.0921 | 0.5855 |
| -1.57 | 0.0046 | 0.2896 | -1.44 | 0.0443 | 0.5505 |
| -1.09 | 0.3645 | 0.7728 | -1.09 | 0.6195 | 0.7626 |
| 1.04  | 0.5417 | 0.8349 | 1.02  | 0.8924 | 0.8223 |
| -1.24 | 0.1182 | 0.6261 | -1.13 | 0.3614 | 0.6610 |
| -1.01 | 0.9814 | 0.9016 | 1.01  | 0.9821 | 0.8359 |
| -1.20 | 0.1948 | 0.6472 | -1.12 | 0.5090 | 0.7252 |
| 1.32  | 0.1840 | 0.6453 | 1.85  | 0.0210 | 0.4879 |
| -1.01 | 0.9344 | 0.8971 | 1.04  | 0.7463 | 0.7946 |
| -2.17 | 0.0011 | 0.1138 | -2.21 | 0.0002 | 0.0384 |
| -1.29 | 0.0436 | 0.5481 | -1.15 | 0.1840 | 0.6034 |
| -1.51 | 0.0192 | 0.4592 | -1.68 | 0.0319 | 0.5268 |
| -1.22 | 0.0912 | 0.6111 | -1.11 | 0.3255 | 0.6517 |
| -1.13 | 0.1718 | 0.6428 | -1.13 | 0.1489 | 0.5990 |
| -1.56 | 0.1047 | 0.6195 | -1.69 | 0.1158 | 0.5927 |
| -1.20 | 0.6393 | 0.8565 | -1.04 | 0.9006 | 0.8236 |
| 1.24  | 0.6349 | 0.8556 | -1.48 | 0.1569 | 0.6002 |
| -1.06 | 0.8536 | 0.8885 | -1.28 | 0.4319 | 0.6913 |
| -1.01 | 0.9841 | 0.9018 | 1.21  | 0.3277 | 0.6523 |
| 1.60  | 0.3888 | 0.7840 | 1.71  | 0.2691 | 0.6328 |
| -1.11 | 0.5909 | 0.8465 | -1.04 | 0.8485 | 0.8148 |
| -1.16 | 0.4680 | 0.8137 | -1.54 | 0.0685 | 0.5739 |
| -1.22 | 0.4841 | 0.8188 | -1.59 | 0.1503 | 0.5993 |
| -1.00 | 0.9649 | 0.9001 | -1.20 | 0.0720 | 0.5760 |
| 1.35  | 0.2511 | 0.7009 | -1.58 | 0.0888 | 0.5843 |
| 1.34  | 0.1969 | 0.6476 | 1.01  | 0.9761 | 0.8350 |
| -1.05 | 0.8802 | 0.8915 | -1.18 | 0.6263 | 0.7646 |
| 1.18  | 0.0435 | 0.5479 | 1.02  | 0.8587 | 0.8166 |
| -1.07 | 0.5641 | 0.8404 | 1.06  | 0.6099 | 0.7597 |
| 1.12  | 0.2869 | 0.7281 | -1.02 | 0.9266 | 0.8277 |
| -1.02 | 0.9186 | 0.8955 | -1.01 | 0.8806 | 0.8203 |
| 1.01  | 0.9066 | 0.8943 | -1.10 | 0.1567 | 0.6002 |
| 1.41  | 0.2876 | 0.7286 | -1.68 | 0.2870 | 0.6395 |
| -1.03 | 0.8816 | 0.8916 | -1.45 | 0.1257 | 0.5949 |
| 1.67  | 0.1822 | 0.6449 | -1.99 | 0.1519 | 0.5995 |
| 1.39  | 0.4651 | 0.8128 | -1.69 | 0.3106 | 0.6472 |
| 1.42  | 0.1688 | 0.6421 | 1.31  | 0.1618 | 0.6008 |
| 1.02  | 0.9508 | 0.8987 | -2.76 | 0.0446 | 0.5509 |
| -1.07 | 0.9086 | 0.8945 | 1.04  | 0.9135 | 0.8257 |
| 1.01  | 0.9793 | 0.9014 | -2.62 | 0.0737 | 0.5770 |
| 1.32  | 0.1294 | 0.6306 | -1.18 | 0.6426 | 0.7692 |
| -1.16 | 0.7943 | 0.8811 | -1.80 | 0.1937 | 0.6043 |
| -1.04 | 0.7486 | 0.8748 | -1.34 | 0.0748 | 0.5777 |

|       |        |        |       |        |        |
|-------|--------|--------|-------|--------|--------|
| 1.02  | 0.8972 | 0.8933 | -1.02 | 0.8966 | 0.8230 |
| -1.18 | 0.1516 | 0.6378 | -1.15 | 0.1268 | 0.5952 |
| 1.02  | 0.9144 | 0.8951 | 1.10  | 0.6993 | 0.7838 |
| -1.05 | 0.8418 | 0.8871 | 1.10  | 0.7802 | 0.8018 |
| -1.07 | 0.5649 | 0.8406 | 1.20  | 0.0813 | 0.5810 |
| -1.05 | 0.8008 | 0.8820 | -1.16 | 0.6061 | 0.7586 |
| 1.06  | 0.7946 | 0.8812 | 1.59  | 0.1532 | 0.5997 |
| -1.05 | 0.8338 | 0.8861 | 1.12  | 0.6783 | 0.7786 |
| -1.01 | 0.9502 | 0.8987 | 1.10  | 0.7022 | 0.7845 |
| -1.05 | 0.7904 | 0.8806 | -1.03 | 0.8752 | 0.8194 |
| 1.07  | 0.5983 | 0.8481 | 1.38  | 0.2126 | 0.6098 |
| 1.04  | 0.8547 | 0.8886 | 1.16  | 0.6216 | 0.7632 |
| -1.02 | 0.8530 | 0.8884 | 1.33  | 0.1829 | 0.6032 |
| 1.11  | 0.5123 | 0.8270 | 1.23  | 0.3140 | 0.6483 |
| 1.15  | 0.4590 | 0.8108 | -1.05 | 0.8745 | 0.8193 |
| 1.30  | 0.2685 | 0.7148 | -1.03 | 0.9385 | 0.8295 |
| 1.09  | 0.6417 | 0.8569 | -1.27 | 0.1987 | 0.6055 |
| -1.20 | 0.2487 | 0.6989 | -1.34 | 0.0720 | 0.5760 |
| -1.66 | 0.0001 | 0.0207 | -1.48 | 0.0149 | 0.4483 |
| -1.07 | 0.6223 | 0.8531 | 1.09  | 0.4722 | 0.7100 |
| -1.10 | 0.6946 | 0.8664 | -1.13 | 0.3852 | 0.6664 |
| -1.00 | 0.9916 | 0.9025 | 1.22  | 0.6583 | 0.7734 |
| 1.20  | 0.4586 | 0.8106 | 1.20  | 0.5071 | 0.7245 |
| 1.49  | 0.1408 | 0.6346 | 1.60  | 0.1488 | 0.5990 |
| 1.57  | 0.3991 | 0.7884 | -1.54 | 0.0301 | 0.5220 |
| 1.33  | 0.1436 | 0.6354 | -1.13 | 0.4610 | 0.7050 |
| 1.25  | 0.2790 | 0.7225 | -1.12 | 0.4620 | 0.7055 |
| 1.03  | 0.6852 | 0.8648 | 1.12  | 0.4403 | 0.6954 |
| -1.09 | 0.3125 | 0.7447 | 1.16  | 0.2980 | 0.6432 |
| 1.02  | 0.8291 | 0.8856 | 1.00  | 0.9753 | 0.8349 |
| 1.16  | 0.3175 | 0.7477 | 1.00  | 0.9754 | 0.8349 |
| 1.15  | 0.7899 | 0.8806 | -2.42 | 0.1410 | 0.5978 |
| 1.28  | 0.6095 | 0.8505 | -1.01 | 0.9761 | 0.8350 |
| 1.13  | 0.6360 | 0.8558 | 1.17  | 0.6850 | 0.7803 |
| 1.06  | 0.8479 | 0.8878 | 1.08  | 0.8733 | 0.8191 |
| 1.04  | 0.8430 | 0.8872 | -1.08 | 0.7429 | 0.7939 |
| -1.18 | 0.1752 | 0.6435 | 1.19  | 0.2472 | 0.6236 |
| 1.27  | 0.1940 | 0.6471 | 1.06  | 0.8229 | 0.8101 |
| 1.12  | 0.6533 | 0.8591 | 1.21  | 0.6164 | 0.7617 |
| 1.08  | 0.7314 | 0.8722 | 1.21  | 0.5766 | 0.7493 |
| 1.17  | 0.5753 | 0.8430 | 1.06  | 0.8835 | 0.8208 |
| -1.07 | 0.7199 | 0.8705 | 1.01  | 0.9702 | 0.8342 |
| 1.25  | 0.2862 | 0.7276 | 1.23  | 0.3782 | 0.6648 |
| 1.62  | 0.1178 | 0.6259 | 1.61  | 0.2397 | 0.6201 |
| -1.07 | 0.5861 | 0.8454 | -1.09 | 0.6379 | 0.7678 |
| 1.21  | 0.4156 | 0.7950 | -1.10 | 0.7503 | 0.7955 |
| 1.23  | 0.1952 | 0.6473 | 1.01  | 0.9755 | 0.8349 |
| 1.51  | 0.1839 | 0.6453 | 1.45  | 0.3806 | 0.6654 |
| 1.02  | 0.8359 | 0.8864 | -1.05 | 0.7784 | 0.8014 |
| 1.04  | 0.7879 | 0.8803 | 1.04  | 0.8321 | 0.8118 |
| 1.37  | 0.1558 | 0.6389 | 1.29  | 0.4260 | 0.6884 |
| -1.06 | 0.6704 | 0.8622 | -1.05 | 0.5923 | 0.7544 |

|       |        |        |       |        |        |
|-------|--------|--------|-------|--------|--------|
| -1.59 | 0.0456 | 0.5529 | 1.18  | 0.5647 | 0.7454 |
| 1.36  | 0.0297 | 0.5018 | -1.13 | 0.3867 | 0.6672 |
| 1.07  | 0.7236 | 0.8710 | 1.15  | 0.3105 | 0.6472 |
| 1.08  | 0.5504 | 0.8371 | -1.07 | 0.4945 | 0.7194 |
| -1.29 | 0.1515 | 0.6377 | -1.18 | 0.4457 | 0.6980 |
| -1.13 | 0.4806 | 0.8177 | -1.12 | 0.4602 | 0.7047 |
| -1.14 | 0.4088 | 0.7923 | -1.22 | 0.2331 | 0.6169 |
| -1.48 | 0.1050 | 0.6196 | 1.01  | 0.9690 | 0.8340 |
| 1.04  | 0.8697 | 0.8903 | -1.15 | 0.5158 | 0.7278 |
| -1.11 | 0.5568 | 0.8386 | -1.21 | 0.2264 | 0.6136 |
| -1.31 | 0.1948 | 0.6472 | -1.20 | 0.3703 | 0.6631 |
| -1.02 | 0.9298 | 0.8967 | -1.13 | 0.4790 | 0.7129 |
| -1.09 | 0.4273 | 0.7995 | -1.14 | 0.2212 | 0.6122 |
| -1.08 | 0.6246 | 0.8536 | 1.19  | 0.1702 | 0.6019 |
| -1.30 | 0.1242 | 0.6286 | -1.07 | 0.5935 | 0.7547 |
| -1.40 | 0.0505 | 0.5633 | -1.18 | 0.1894 | 0.6039 |
| -1.14 | 0.4824 | 0.8183 | -1.32 | 0.2185 | 0.6115 |
| -1.13 | 0.4050 | 0.7908 | -1.20 | 0.1102 | 0.5913 |
| -1.02 | 0.8804 | 0.8915 | -1.16 | 0.1861 | 0.6036 |
| -1.54 | 0.0256 | 0.4814 | 1.01  | 0.9579 | 0.8324 |
| -1.13 | 0.5288 | 0.8315 | -1.43 | 0.0697 | 0.5746 |
| -1.33 | 0.1256 | 0.6292 | -1.06 | 0.8059 | 0.8069 |
| 1.18  | 0.3251 | 0.7521 | -1.04 | 0.8412 | 0.8135 |
| -1.11 | 0.5287 | 0.8315 | -1.18 | 0.3226 | 0.6508 |
| -1.26 | 0.1842 | 0.6453 | -1.22 | 0.3080 | 0.6464 |
| -1.10 | 0.5425 | 0.8351 | -1.30 | 0.0980 | 0.5876 |
| -1.19 | 0.4084 | 0.7922 | 1.34  | 0.1591 | 0.6005 |
| -1.19 | 0.2462 | 0.6968 | -1.04 | 0.8688 | 0.8183 |
| 1.45  | 0.0836 | 0.6053 | 1.12  | 0.4299 | 0.6903 |
| 1.06  | 0.4387 | 0.8037 | 1.00  | 0.9617 | 0.8330 |
| 1.56  | 0.0367 | 0.5285 | -1.03 | 0.7950 | 0.8048 |
| 1.14  | 0.4964 | 0.8225 | 1.46  | 0.0042 | 0.2618 |
| 1.49  | 0.1310 | 0.6312 | -1.03 | 0.8440 | 0.8140 |
| 1.27  | 0.1268 | 0.6296 | 1.04  | 0.5285 | 0.7326 |
| 1.12  | 0.0729 | 0.5953 | -1.00 | 0.9457 | 0.8306 |
| -1.02 | 0.8037 | 0.8824 | 1.03  | 0.7086 | 0.7861 |
| -1.24 | 0.4734 | 0.8154 | -1.32 | 0.3463 | 0.6573 |
| -1.18 | 0.3511 | 0.7662 | -1.14 | 0.5250 | 0.7313 |
| 1.04  | 0.7701 | 0.8779 | 1.11  | 0.5247 | 0.7312 |
| 1.59  | 0.0127 | 0.4195 | 1.11  | 0.6673 | 0.7758 |
| 1.14  | 0.7013 | 0.8675 | 1.27  | 0.5479 | 0.7396 |
| 1.39  | 0.1127 | 0.6236 | 1.24  | 0.2261 | 0.6135 |
| 1.02  | 0.9185 | 0.8955 | -1.03 | 0.8890 | 0.8217 |
| -1.24 | 0.4960 | 0.8224 | 1.09  | 0.8599 | 0.8168 |
| 1.22  | 0.3371 | 0.7588 | 1.33  | 0.4373 | 0.6939 |
| 1.18  | 0.3280 | 0.7538 | 1.43  | 0.0101 | 0.3957 |
| 1.29  | 0.4943 | 0.8219 | 1.07  | 0.8357 | 0.8125 |
| -1.70 | 0.1384 | 0.6338 | -1.66 | 0.2806 | 0.6372 |
| -1.30 | 0.3284 | 0.7540 | -1.34 | 0.2859 | 0.6391 |
| 1.02  | 0.7856 | 0.8800 | -1.05 | 0.4994 | 0.7214 |
| 1.56  | 0.0471 | 0.5563 | 1.01  | 0.9764 | 0.8351 |
| 1.09  | 0.4707 | 0.8146 | 1.22  | 0.2188 | 0.6116 |



|       |        |        |       |        |        |
|-------|--------|--------|-------|--------|--------|
| -1.03 | 0.9236 | 0.8961 | -1.43 | 0.2796 | 0.6368 |
| -1.96 | 0.1025 | 0.6182 | -1.72 | 0.3242 | 0.6513 |
| 1.78  | 0.0235 | 0.4752 | -1.57 | 0.1822 | 0.6032 |
| 1.36  | 0.1011 | 0.6174 | -1.27 | 0.4882 | 0.7168 |
| 1.76  | 0.0234 | 0.4749 | 1.38  | 0.3336 | 0.6539 |
| 1.40  | 0.0602 | 0.5797 | 1.14  | 0.6811 | 0.7793 |
| -1.01 | 0.9409 | 0.8978 | -1.06 | 0.6334 | 0.7666 |
| -1.13 | 0.7507 | 0.8751 | -1.31 | 0.3672 | 0.6624 |
| 1.04  | 0.5542 | 0.8380 | 1.08  | 0.3652 | 0.6619 |
| 1.05  | 0.6423 | 0.8570 | 1.06  | 0.5268 | 0.7320 |
| 1.05  | 0.8690 | 0.8902 | -1.64 | 0.1072 | 0.5905 |
| 1.04  | 0.6510 | 0.8587 | -1.06 | 0.3349 | 0.6543 |
| -1.18 | 0.2295 | 0.6817 | -1.11 | 0.4695 | 0.7088 |
| -1.00 | 0.9749 | 0.9010 | 1.10  | 0.1458 | 0.5986 |
| 1.02  | 0.8495 | 0.8880 | 1.08  | 0.3126 | 0.6479 |
| -1.15 | 0.6304 | 0.8547 | -1.22 | 0.5996 | 0.7566 |
| -1.23 | 0.2912 | 0.7310 | -1.08 | 0.7279 | 0.7905 |
| -1.07 | 0.9112 | 0.8948 | 2.38  | 0.2270 | 0.6138 |
| 1.18  | 0.8037 | 0.8824 | 3.44  | 0.1430 | 0.5981 |
| -1.28 | 0.1754 | 0.6435 | -1.13 | 0.4564 | 0.7029 |
| -1.38 | 0.0067 | 0.3416 | -1.17 | 0.1910 | 0.6040 |
| -1.16 | 0.0912 | 0.6111 | -1.11 | 0.1708 | 0.6019 |
| -1.06 | 0.5208 | 0.8294 | -1.09 | 0.4831 | 0.7147 |
| -1.73 | 0.5766 | 0.8433 | -2.42 | 0.3849 | 0.6663 |
| 1.15  | 0.7109 | 0.8690 | 1.31  | 0.5866 | 0.7526 |
| 1.03  | 0.8776 | 0.8912 | 1.22  | 0.3434 | 0.6565 |
| -1.64 | 0.0960 | 0.6143 | 1.02  | 0.9530 | 0.8317 |
| -1.67 | 0.2012 | 0.6525 | 1.62  | 0.2691 | 0.6328 |

**Supplemental Figure 1. Strategy used to identify plasma metabolites altered in subjects with compared to without depressive symptoms.** Untargeted metabolomic profiling was performed on 104 plasma samples from three independent cohorts (HIV-positive test cohort, HIV-positive validation cohort, and HIV-negative cohort).

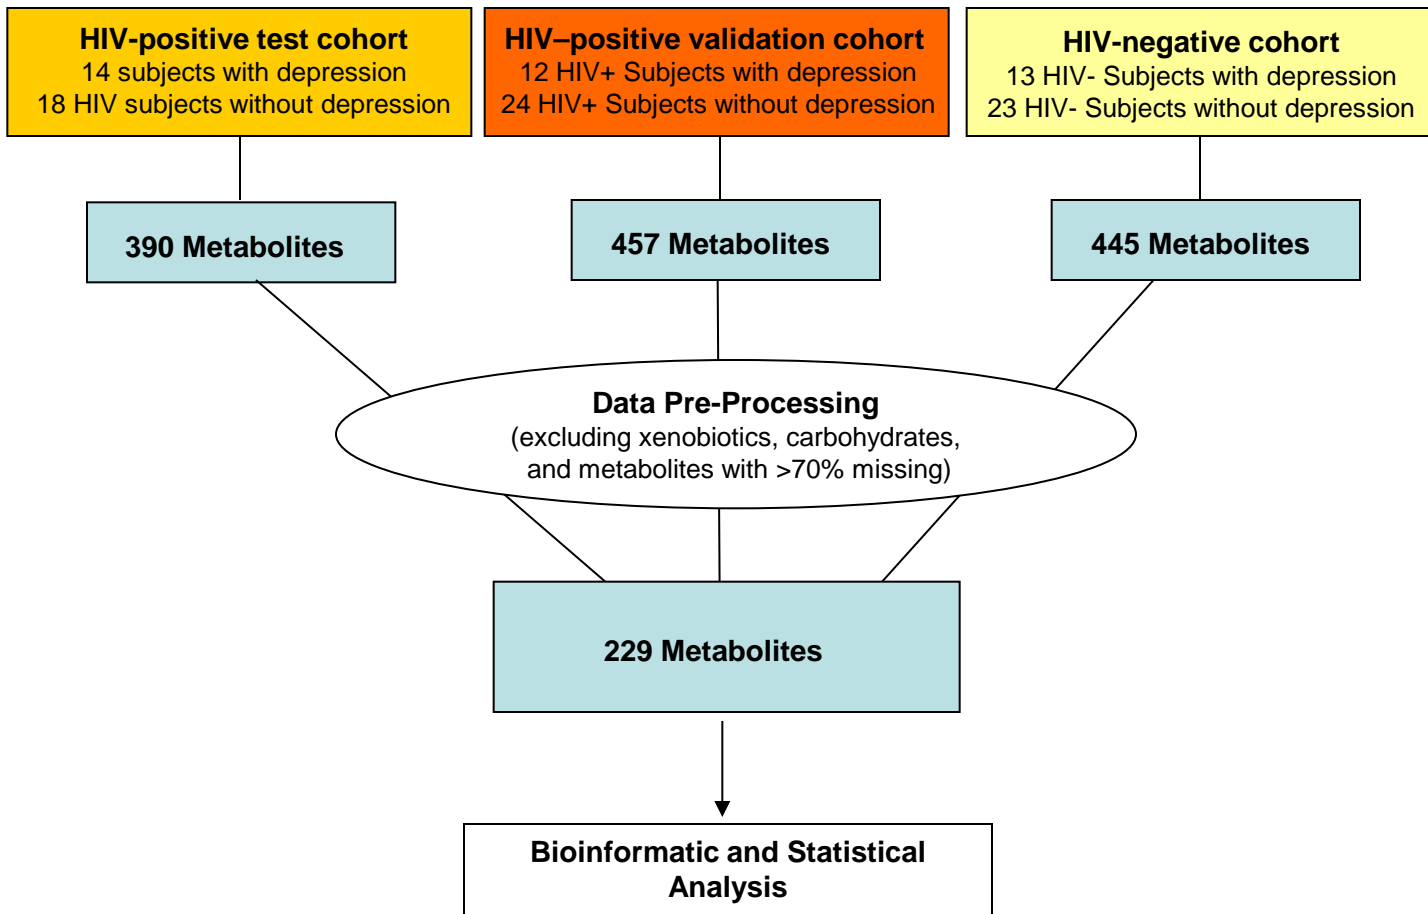

**Supplemental Figure 2. PLS-DA analysis of signature metabolites shows separation of metabolomes of subjects with compared to without depressive symptoms.** Shown are analyses from the HIV-positive test cohort (n=6 metabolites), HIV-positive validation cohort (n=5 metabolites), and HIV-negative test cohort (n=5 metabolites). P-values from the permutation test were used to assess class discrimination.

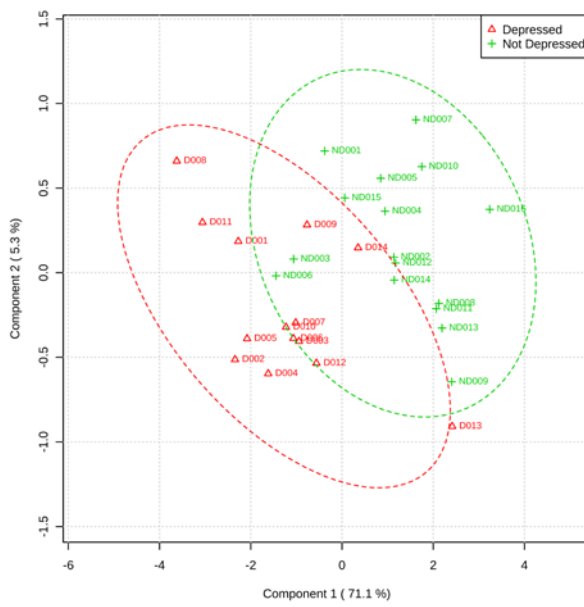

HIV-positive test cohort

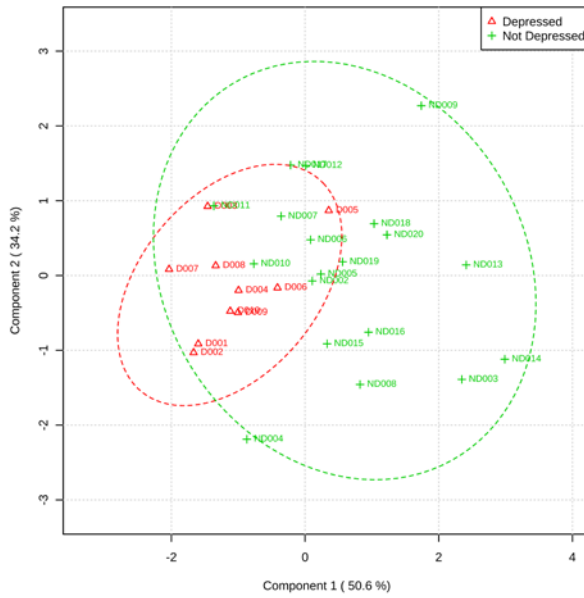

HIV-positive validation cohort

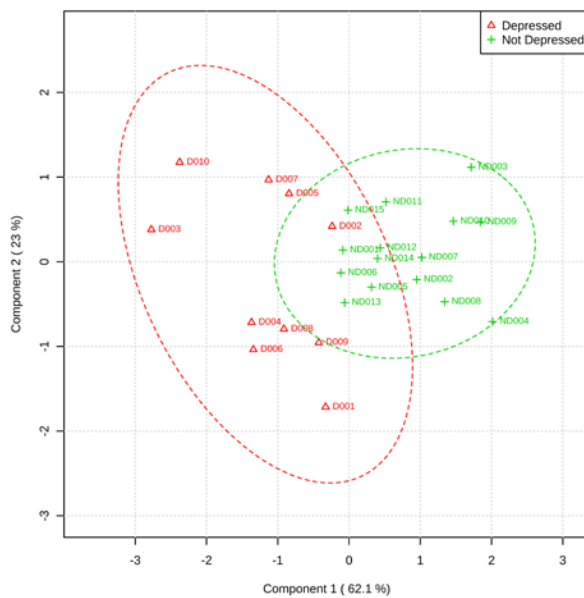

HIV-negative cohort

**Supplemental Figure 3.** P-value scatter plot of metabolites related to tryptophan catabolism (tryptophan, kynurenine, and K:T ratio) and inflammation markers altered in the HIV-infected individuals with vs. without depressive symptoms. The X- and Y-axis shows  $-\log_{10}$  p-values of markers of tryptophan catabolism and inflammation in subjects with versus without depressive symptoms from the HIV-positive test and validation cohorts (n=22 and 18, respectively). The analyses were limited to subjects <50 years old to minimize confounding effects of age on inflammation markers and groups were matched for age, race, gender, and other clinical covariates as described in the Results.

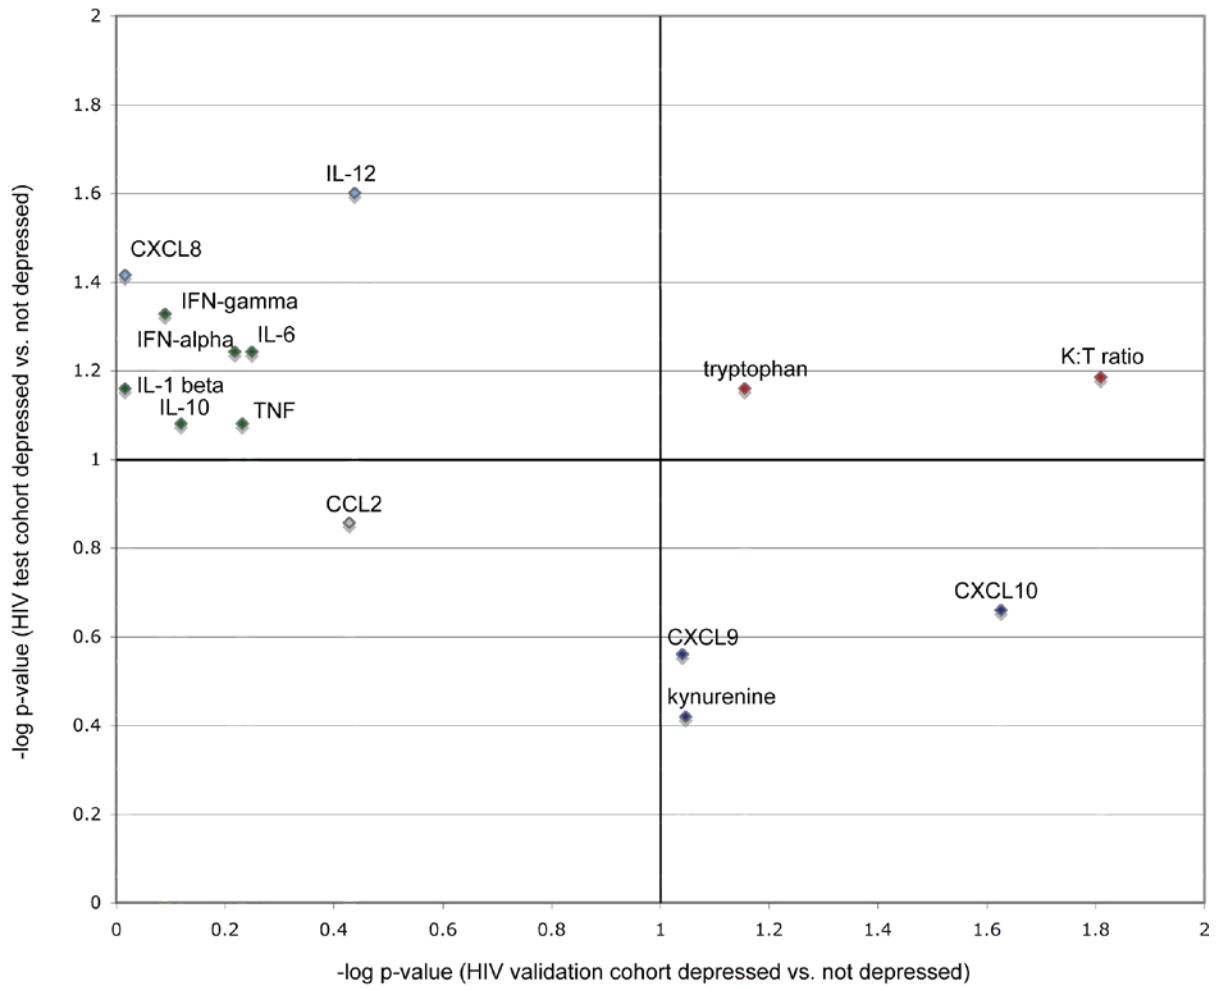

**Supplemental Figure 4. Inter-relationships between plasma metabolites, depression scores, and markers of tryptophan catabolism in HIV-negative subjects.** The correlation matrix and clinical covariate bar were constructed in R using the heatmap.2 function. Pearson correlations were used to evaluate relationships between metabolites ( $p < 0.05$ ,  $FDR \leq 0.1$ ). Spearman correlations were used to examine relationships between metabolites, depression scores, and K:T ratio. Significant correlations had a  $-0.32 > r > 0.32$ ,  $p < 0.05$ , and  $FDR < 10\%$ . Red and blue indicate positive and negative correlations, respectively (see Color Key).



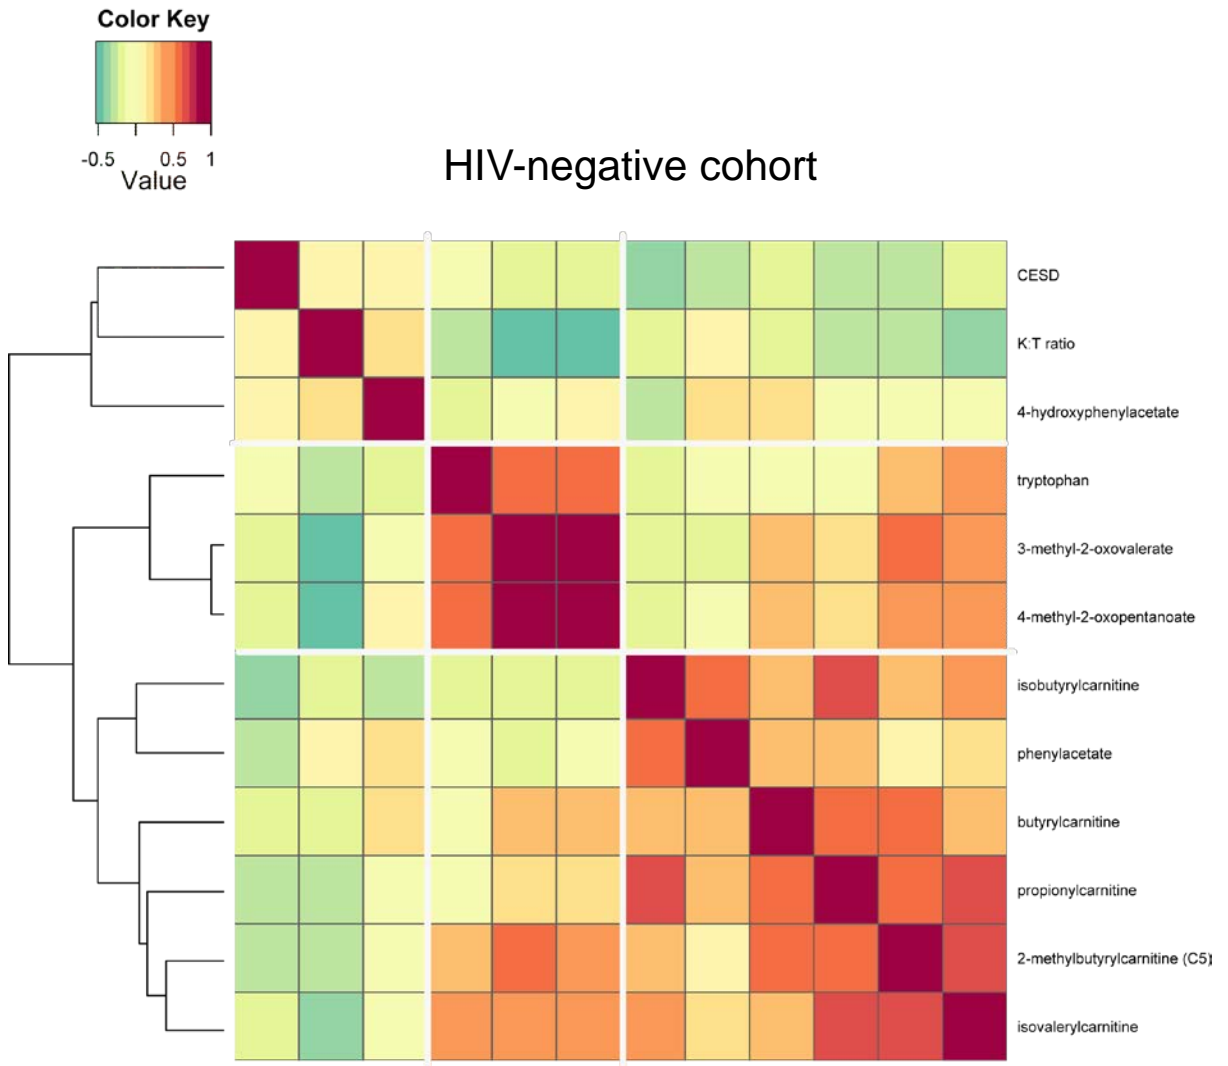

Supplement: NIHMS657471-supplement-Supplemental_Digital_Content.pdf [file NIHMS657471-supplement-Supplemental_Digital_Content.pdf]
